# Supplementary material for: Curcumin Loaded Nanocarriers with Varying Charges Augmented with Electroporation Designed for Colon Cancer Therapy
Source: MDPI journal article supplement (doi:10.3390/ijms23031377), 2022-01-26
Supplement: s1 [file s1]

## ELECTRONIC SUPPLEMENTARY INFORMATION

### Curcumin loaded nanocarriers about variable charge augmented with electroporation designed for colon cancer therapy

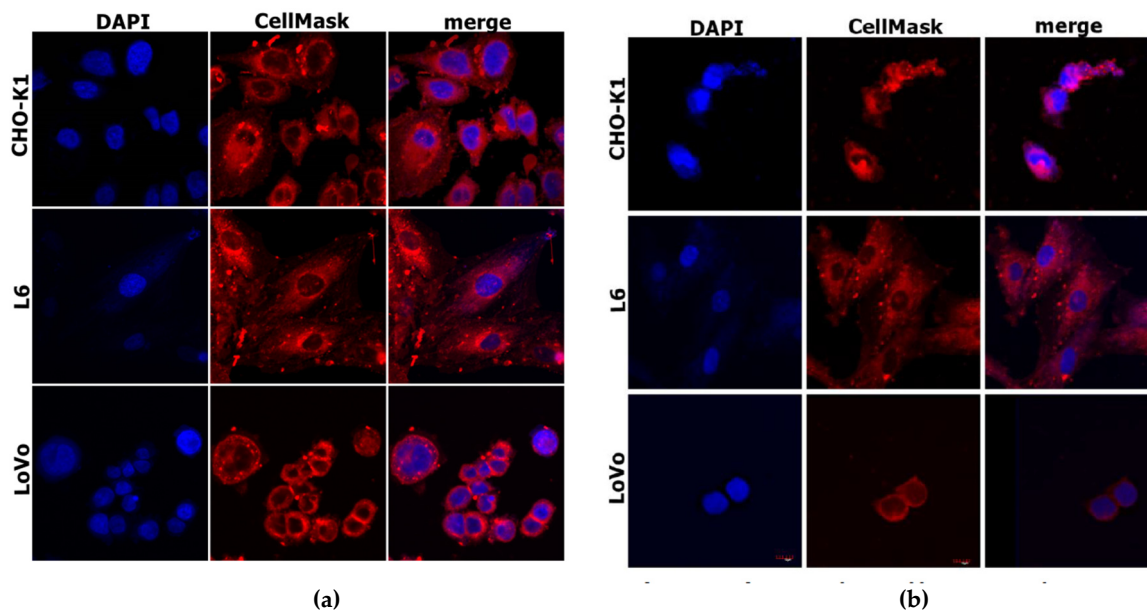

**Figure S1** Cells with stained nuclei (DAPI) and cell membrane marker CellMask: (a) control cells; (b) cells electroporated with 1000 V/cm.

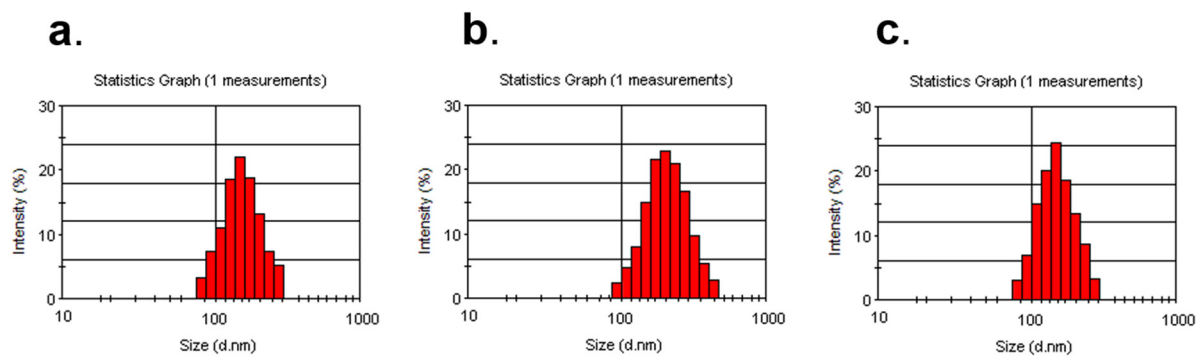

**Figure S2.** DLS size distribution graphs (by intensity) of CUR-loaded nanocarriers stabilized by  $C_{12}(TAPAMS)_2$  (a),  $C_{12}(COONa)_2$  (b), and Cremophor EL (c);
